# Supplementary material for: The Kinase MAP4K1 Inhibits Cytosolic RNA-Induced Antiviral Signaling by Promoting Proteasomal Degradation of TBK1/IKKε
Source: PubMed Central journal article supplement (PMC8672915; doi:10.1128/spectrum.01458-21), 2021-12-15
Supplement: spectrum01458-21_supp_1_seq13.pdf [file spectrum01458-21_supp_1_seq13.pdf]

1 **Supplementary Information for**

2

3 **The Kinase MAP4K1 Inhibits Cytosolic RNA induced anti-viral signaling by**  
4 **Promoting Proteasomal Degradation of TBK1/IKK $\epsilon$**

5 **Tian-Sheng He, Jingping Huang, Tian Chen, Zhi Zhang, Cai Kuntai, Yu Jingge,**  
6 **Liang-Guo Xu<sup>¶</sup>**

7

8

9

10

11

12

13 <sup>¶</sup>Address correspondence to:

14 Liang-Guo Xu, email: xul@jxnu.edu.cn

15

16

17

18

19 This PDF file includes:

20

21 Figures S1 to S3

22

23

24

25

**A**

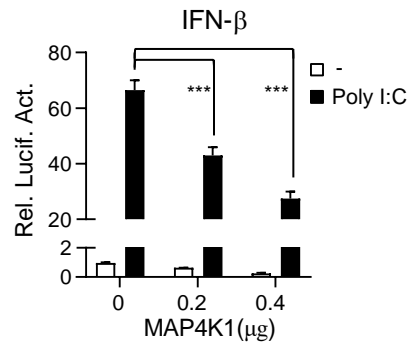

**B**

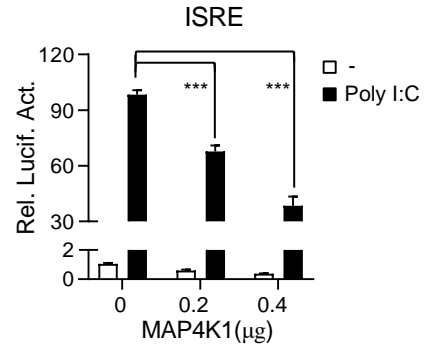

**Fig. S1 MAP4K1 negatively regulates RLR signaling pathway**

(A-B) MAP4K1 inhibited the activation of the IFNB1 and ISRE induced by PolyI:C. Similar luciferase assay was performed as Fig. 1B except that PolyI:C (0.2 μg) were transfected or not for 10 h.

**A**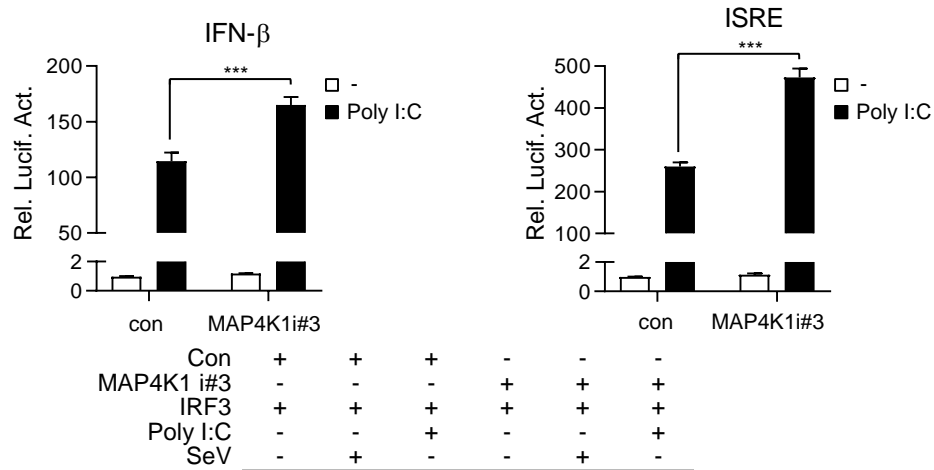**B**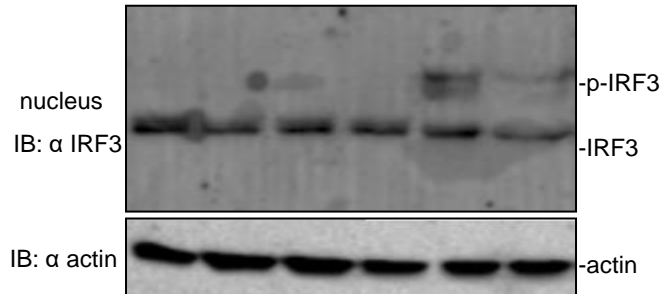

### Fig. S2 Knockdown of MAP4K1 potentiates antiviral responses

(A) Knockdown of MAP4K1 potentiated the activation of the IFNB1 and ISRE induced by PolyI:C. Similar luciferase assay was performed as Fig. 2C except that PolyI:C (0.2 $\mu$ g) were transfected or not for 10 h.

(B) Knockdown of MAP4K1 enhanced the phosphorylation of IRF3. 293T cells transfected MAP4K1 RNAi#3 or control and IRF3, and treated with SeV or transfected PolyI:C for 10 h. Nuclear protein was extracted and immunoblotting analyzed with IRF3.

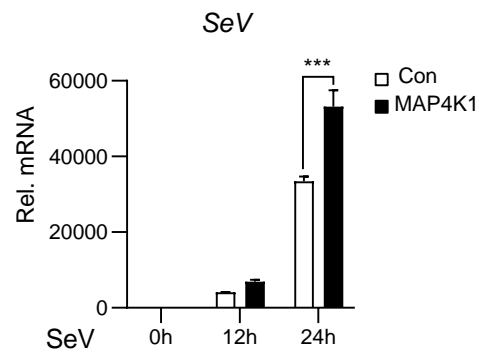

**Fig. S3 MAP4K1 promotes SeV replication.**

HEK293T cells were transfected with MAP4K1 or control for 12 h followed by SeV infection for the for 1 h, and then cells were replaced with new medium for another indicated time. SeV genomic RNA in cells was extracted for realtime PCR tests by specific genomic primers.
